# Supplementary material for: CNBP Binds and Unfolds In Vitro G-Quadruplexes Formed in the SARS-CoV-2 Positive and Negative Genome Strands
Source: MDPI journal article supplement (doi:10.3390/ijms22052614), 2021-03-05
Supplement: s1 [file s1]

Figure S1

(a)

Selected PQSs in +gRNA

|            |                      | Location +gRNA |               |
|------------|----------------------|----------------|---------------|
| SARS-CoV-2 | GGUAAUAAAGGAGCUGGUGG | 644            |               |
| RaTG13     | GGUAAUAAAGGAGCUGGUGG | 644            | 100% identity |
| Bat_C21    | GGUAAUAAAGGAGCUGGUGG | 643            | 100% identity |
| Bat_C45    | GGUAAUAAAGGAGCUGGUGG | 643            | 100% identity |
| SARS-CoV   | GGUAAUAAAGGAGCUGGUGG | 643            | 90% identity  |

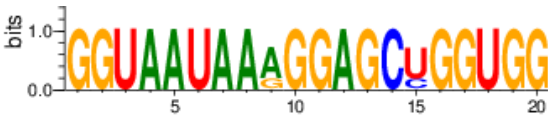

|            |                            | Location +gRNA |              |
|------------|----------------------------|----------------|--------------|
| SARS-CoV-2 | GGAGGAGGUGUUGCAGG          | 3,467          |              |
| RaTG13     | GGAGGAGGUGUUGC- <b>GG</b>  | 3,464          | 94% identity |
| Bat_C21    | GGAGGAGGUGUUGC <b>U</b> GG | 3,385          | 94% identity |
| Bat_C45    | GGAGGAGGUGUUGC <b>U</b> GG | 3,451          | 94% identity |

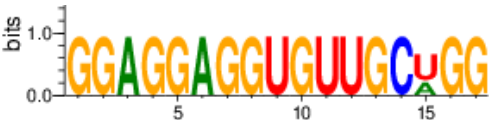

|            |                                        | Location +gRNA |               |
|------------|----------------------------------------|----------------|---------------|
| SARS-CoV-2 | GGCUGGCAAUGGCGG-----                   | 28,903         |               |
| RaTG13     | GG <b>A</b> UGGC--UGGC <b>AAUGG</b>    | 28,880         | 66% identity  |
| Bat_C21    | GGCUGGCAAUGGCGG-----                   | 28,739         | 100% identity |
| Bat_C45    | GGCUGGCAAUGGCGG-----                   | 28,808         | 100% identity |
| SARS-CoV   | GGCU <b>A</b> GC <b>GGAGGUGG</b> ----- | 28,752         | 67% identity  |
| MERS-CoV-2 | --- <b>GGGUAUUGGCGGAGACAGG</b>         | 28,791         | 60% identity  |

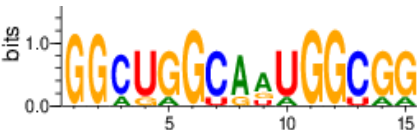

Figure S1

(b)

Selected PQSs in -gRNA

|            |                     | Location<br>-gRNA | Location<br>+gRNA |               |
|------------|---------------------|-------------------|-------------------|---------------|
| SARS-CoV-2 | GGAUUAUGGUUUGGUUUGG | 23,877            | 6,027             |               |
| RaTG13     | GGAUAAAGGUUUGGUUUGG | 23,832            | 6,024             | 100% identity |
| Bat_C21    | GG-UAAGGUUUGGUUUGG  | 23,786            | 5,947             | 88% identity  |
| Bat_C45    | GG-UAAGGUUUGGUUUGG  | 23,790            | 6,013             | 88% identity  |

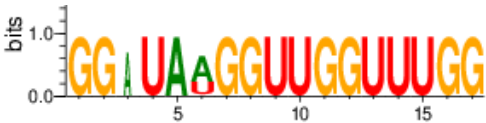

|            |                                  | Location<br>-gRNA | Location<br>+gRNA |              |
|------------|----------------------------------|-------------------|-------------------|--------------|
| SARS-CoV-2 | GGUGAUAGAGGUUUUGUGGUUGGUUGG----- | 19,865            | 10,039            |              |
| RaTG13     | GGUGAUAGAGGUUUUGUGGUUGG-----     | 19,820            | 10,036            | 84% identity |
| Bat_C21    | -----GGUGGUUGGUAGAGG             | 19,789            | 9,944             | 36% identity |
| Bat_C45    | -----GGUGGUUGGUAGAGG             | 19,793            | 10,010            | 36% identity |
| MERS-CoV   | GGUUAUAGCUACAGUUGGUUGGUUGG-----  | 20,116            | 10,004            | 60% identity |

|            |                    | Location<br>-gRNA | Location<br>+gRNA |              |
|------------|--------------------|-------------------|-------------------|--------------|
| SARS-CoV-2 | GGAUCUGGGUAAGGAAGG | 13,963            | 15,941            |              |
| RaRG13     | GGAUCGGGUAAGGAGG   | 13,918            | 15,938            | 89% identity |
| Bat_C21    | GGAUCUGGAUAAGGCAGG | 13,871            | 15,862            | 89% identity |
| Bat_C45    | GGAUCUGGAUAAGGCAGG | 13,875            | 15,928            | 89% identity |
| SARS-CoV   | GGAUCUGGGUAAGGCAGG | 13,881            | 15,871            | 94% identity |
| MERS-CoV   | GG-UCUGGAUAAGGAAGG | 14,209            | 15,911            | 89% identity |

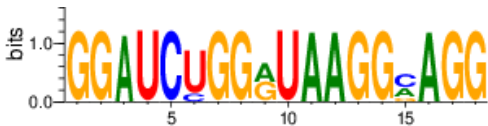

Figure S1

(c)

Not selected PQS

|            |                      | Location +gRNA |               |
|------------|----------------------|----------------|---------------|
| SARS-CoV-2 | GGUAUGUGGAAAGGUUAUGG | 13,385         |               |
| RaTG13     | GGUAUGUGGAAAGGUUAUGG | 13,382         | 100% identity |
| Bat_C21    | GGAAUGUGGAAAGGUUAUGG | 13,306         | 95% identity  |
| Bat_C45    | GGAAUGUGGAAAGGUUAUGG | 13,372         | 95% identity  |
| SARS-CoV   | GGAAUGUGGAAAGGUUAUGG | 13,315         | 95% identity  |

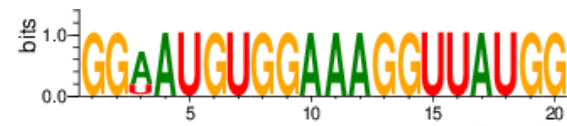

|            |                     | Location<br>-gRNA | Location<br>+gRNA |               |
|------------|---------------------|-------------------|-------------------|---------------|
| SARS-CoV-2 | GGUUAAGUGGUGGUCUAGG | 13,134            | 16,768            |               |
| RaRG13     | GGUUAAGUGGUGGUCUAGG | 13,091            | 16,765            | 100% identity |

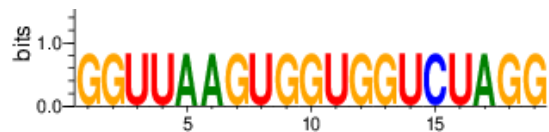

**Figure S1.** Multiple sequence alignments of the position-conserved selected SARS-CoV-2 PQSs identified in this study with their homologous PQSs in other members of the *Coronaviridae* family. (a) Selected PQSs in the +gRNA. (b) Selected PQSs in the -gRNA. (c) Not selected PQSs +13,385 of the +gRNA of SARS-CoV-2 (conserved in position and with significantly high cGcC scores, > 150) and -13,134 of the -gRNA of SARS-CoV-2 (conserved in sequence and position only in two viral genomes).

**Figure S2**

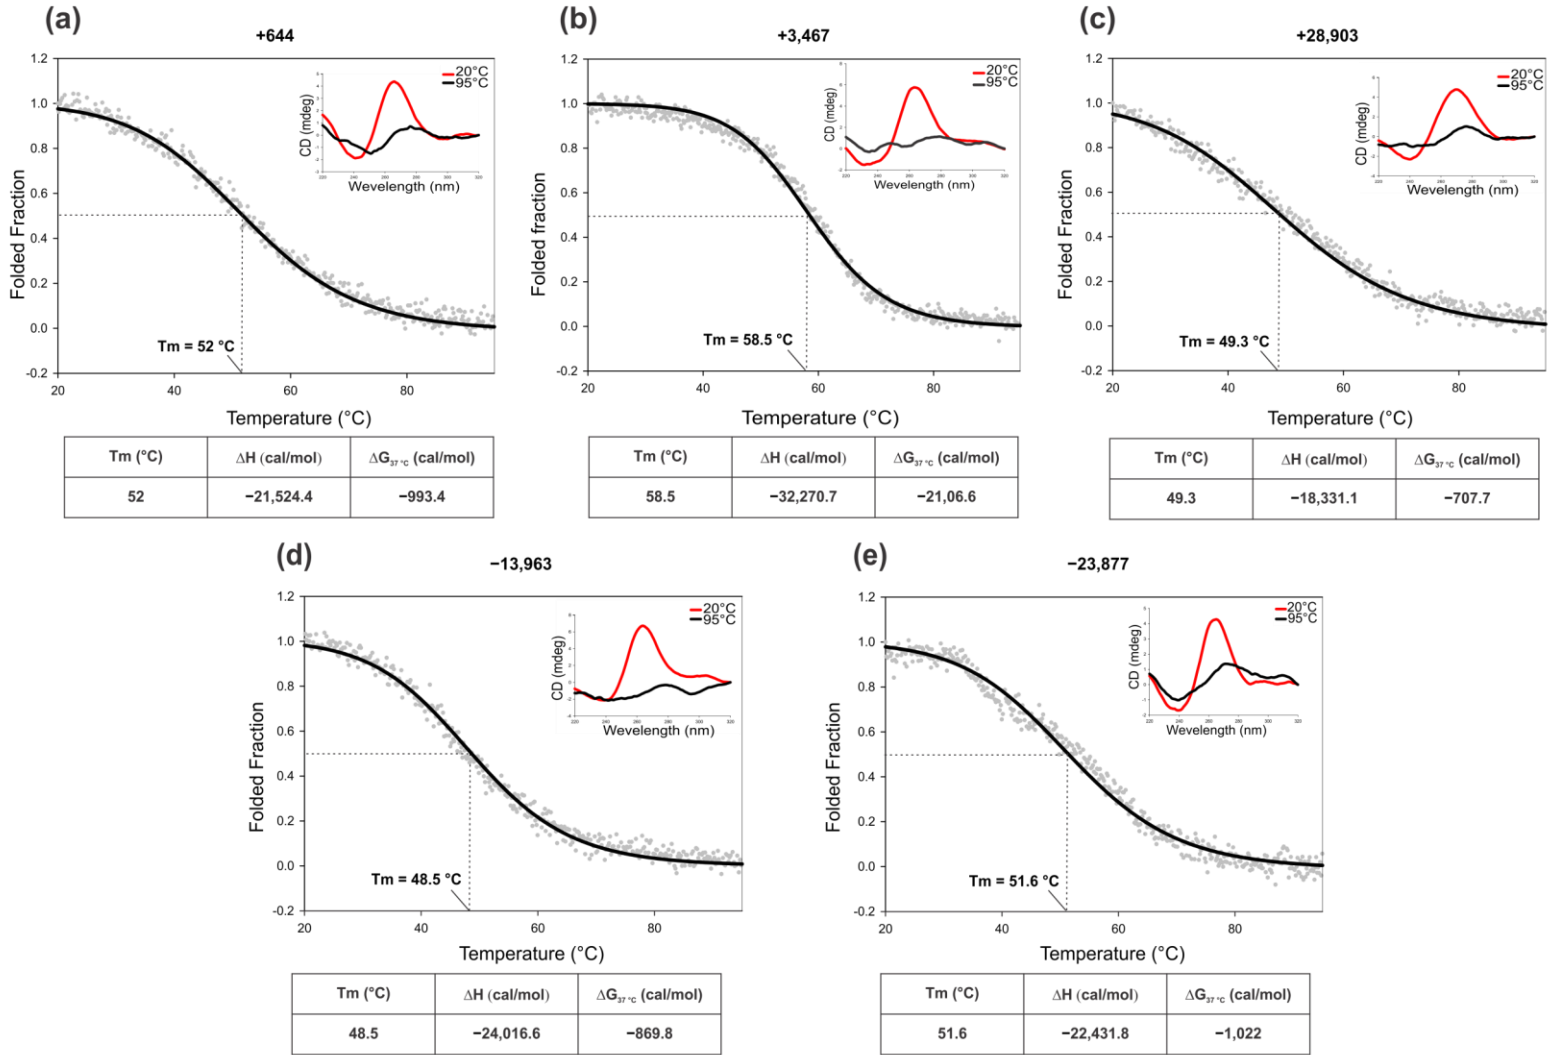

**Figure S2.** CD melting curves obtained for selected PQSs in the positive and negative-sense RNA genomes of SARS-CoV-2. (a), (b) and (c) show the results of selected PQSs in +gRNA of SARS-CoV-2: +644, +3,467 and +28,903, respectively. (d) and (e) show the results of selected PQSs in -gRNA of SARS-CoV-2: -13,963 and -23,877, respectively. Experimental data (dots) and fitted curves (solid lines) are represented.  $\text{K}^+$  concentrations were 100 mM (+3,467 and -23,877) or 200 mM (+644, +28,903 and -13,963). Estimated melting temperatures ( $T_m$ ), changes of enthalpies ( $\Delta H$ ) and change of free Gibbs energy at 37  $^{\circ}\text{C}$  ( $\Delta G_{37^{\circ}\text{C}}$ ) are informed below each graph. Insets in the top-right corners show CD spectra performed at the initial temperature (20  $^{\circ}\text{C}$ , red) and at the final temperature (95  $^{\circ}\text{C}$ , black) of the melting curve for each PQS.

**Figure S3**

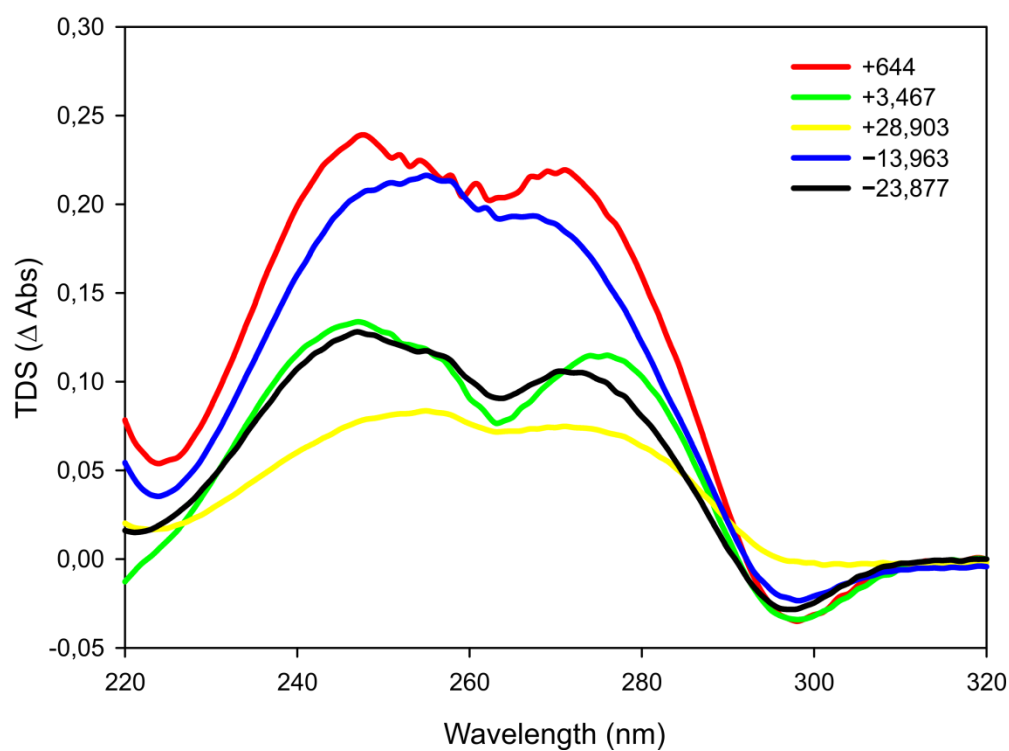

**Figure S3.** TDS obtained for selected PQSs in the positive and negative-sense RNA genomes of SARS-CoV-2. TDS resulting from the subtraction of the 20 °C absorbance spectra from the 70 °C absorbance spectra.  $K^+$  concentrations were 100 mM (+3,467 and -23,877) or 200 mM (+644, +28,903 and -13,963).

Figure S4

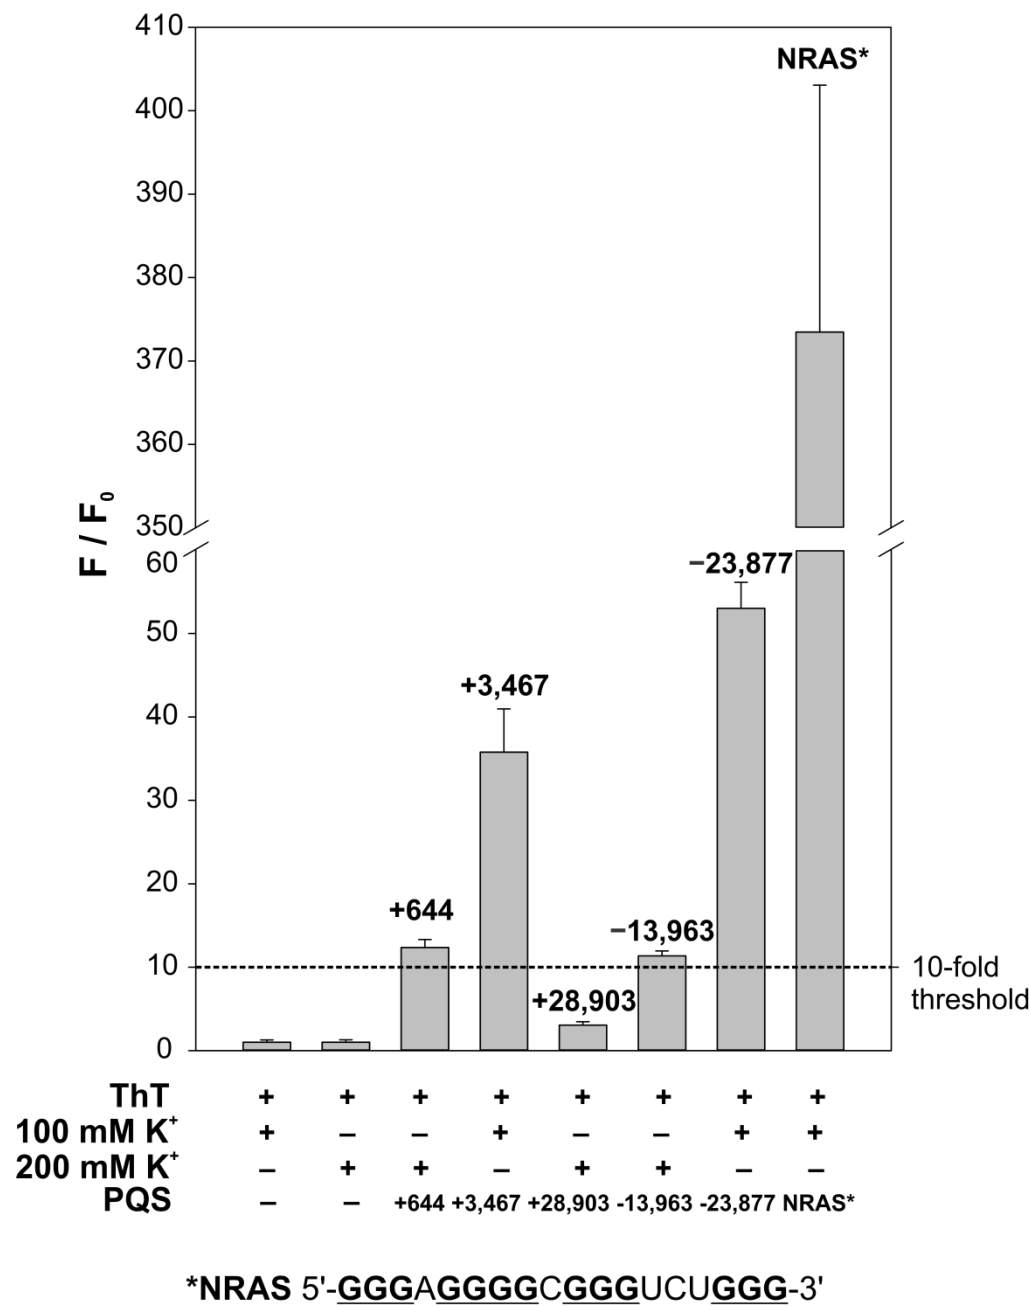

**Figure S4.** ThT fluorescence assay for selected PQSs in the positive and negative-sense RNA genomes of SARS-CoV-2. Bar graph of fluorescence enhancement ( $F/F_0$ ) of ThT in the presence of the selected PQSs folded in the presence of 100 or 200 mM  $K^+$  as indicated. Each bar represents the mean of three technical repeats and error bars correspond to standard deviation (SD). The marked threshold of 10-fold was used for considering G4 formation. Below the graph the sequence of NRAS RNA oligonucleotide used as positive control for the assay is represented.
