# Supplementary material for: CNBP Binds and Unfolds In Vitro G-Quadruplexes Formed in the SARS-CoV-2 Positive and Negative Genome Strands
Source: Int J Mol Sci. 2021 Mar 5;22(5):2614. doi: 10.3390/ijms22052614 (PMC7961906; doi:10.3390/ijms22052614)
Supplement: Supplementary file 1 [file ijms-22-02614-s001.zip]

Archive with 5 entries (5 files):
- Supplementary Table S2-Proofreading.xlsx
- Supplementary Table S3-Proofreading.docx
- Supplementary Table S4-Proofreading.docx
- Supplementary Table S1.xlsx
- Supplementary Figures-Proofreading.pdf
