# Supplementary material for: CNBP Binds and Unfolds In Vitro G-Quadruplexes Formed in the SARS-CoV-2 Positive and Negative Genome Strands
Source: Int J Mol Sci. 2021 Mar 5;22(5):2614. doi: 10.3390/ijms22052614 (PMC7961906; doi:10.3390/ijms22052614)
Supplement: Supplementary file 1 [file ijms-22-02614-s001.zip › Supplementary Table S1.xlsx]

## Sheet: SARS-CoV-2
Table S1. PQS predicted in +gRNA of the SARS-CoV-2 and other members of the Coronaviridae family
G4RNA screener v0.2, Window length: 40, Window step: 10, Thresholds: cGcC > 4.5, G4H > 0.9, G4NN > 0.5 QGRS Mapper Max Length: 45 | Min G-Group Size: 2 | Loop size: from 1 to 15 PQS finder Max Length: 45 | Min G-Group Size: 2 | Min score: 20 | Loop size: from 1 to 15
Position	Region	Gene	Length	Sequence	G4RNA Screener			QGRS Mapper	PQS finder
					cGcC	G4H	G4NN
236	5´UTR		34	GGUUUCGUCCGGGUGUGACCGAAAGGUAAGAUGG	3	0.5	0.0571	31	-
353	CDS	ORF1ab - nsp1	25	GGCUUUGGAGACUCCGUGGAGGAGG	3.6667	0.64	0.0214	31	21
545	CDS	ORF1ab - nsp1	35	GGCAUUCAGUACGGUCGUAGUGGUGAGACACUUGG	3.5	0.4286	0.1156	33	-
644	CDS	ORF1ab - nsp1	32	GGUAAUAAAGGAGCUGGUGGCCAUAGUUACGG	3.6667	0.5	0.6856	33	20
644	CDS	ORF1ab - nsp1	20	GGUAAUAAAGGAGCUGGUGG	17	0.8	0.6907	30	20
1574	CDS	ORF1ab - nsp2	26	GGUGUUGUUGGAGAAGGUUCCGAAGG	5	0.6154	0.2025	33	-
1805	CDS	ORF1ab - nsp2	32	GGAAAAGCUAAAAAAGGUGCCUGGAAUAUUGG	3.6	0.4063	0.0278	28	-
2714	CDS	ORF1ab - nsp2/3	29	GGCGGUGCACCAACAAAGGUUACUUUUGG	2.125	0.3103	0.0302	25	-
3467	CDS	ORF1ab - nsp3	17	GGAGGAGGUGUUGCAGG	18	1	0.8704	30	24
4255	CDS	ORF1ab - nsp3	32	GGGUCAGGGUUUAAAUGGUUACACUGUAGAGG	10	0.7813	0.3162	29	-
4487	CDS	ORF1ab - nsp3	35	GGUAUUAAAAUACAAGAGGGUGUGGUUGAUUAUGG	25	0.6571	0.0362	25	-
4616	CDS	ORF1ab - nsp3	42	GGCUAUGUAACACAUGGCUUAAAUUUGGAAGAAGCUGCUCGG	2.8571	0.3095	0.0286	32	-
5036	CDS	ORF1ab - nsp3	32	GGACAACAGUUUGGUCCAACUUAUUUGGAUGG	2.4286	0.3125	0.0052	26	-
7213	CDS	ORF1ab - nsp3	41	GGAUUUAACUGCUUUUGGCUUAGUUGCAGAGUGGUUUUUGG	5.25	0.4146	0.0013	27	-
8687	CDS	ORF1ab - nsp4	23	GGAUACAAGGCUAUUGAUGGUGG	8.5	0.6522	0.1148	29	-
10058	CDS	ORF1ab-nsp5	40	GGUUUUAGAAAAAUGGCAUUCCCAUCUGGUAAAGUUGAGG	1.5833	0.25	0.0045	34	-
10255	CDS	ORF1ab-nsp6	36	GGUACAGGCUGGUAAUGUUCAACUCAGGGUUAUUGG	5.4	0.5833	0.1483	28	-
10466	CDS	ORF1ab-nsp7	35	GGUUCAUUCCUUAAUGGUUCAUGUGGUAGUGUUGG	3.1667	0.3714	0.1167	30	-
10549	CDS	ORF1ab-nsp8	42	GGAAUUACCAACUGGAGUUCAUGCUGGCACAGACUUAGAAGG	2	0.2381	0.1636	33	-
13201	CDS	ORF1ab-nsp10	33	GGAAGCCAAUAUGGAUCAAGAAUCCUUUGGUGG	2	0.2727	0.0112	23	-
13385	CDS	ORF1ab-nsp10	20	GGUAUGUGGAAAGGUUAUGG	170	0.85	0.022	34	20
18296	CDS	ORF1ab-nsp14	23	GGAUUGGCUUCGAUGUCGAGGGG	10.3333	1.0435	0.4605	24	-
20869	CDS	ORF1ab-nsp16	32	GGUGCUGGUUCUGAUAAAGGAGUUGCACCAGG	2.8571	0.4063	0.6049	30	-
22216	CDS	S	40	GGGUUUUUCGGCUUUAGAACCAUUGGUAGAUUUGCCAAUAGG	2.5	0.33	0.0014	29	-
22316	CDS	S	29	GGUGAUUCUUCUUCAGGUUGGACAGCUGG	3.6	0.4483	0.1218	25	-
24215	CDS	S	20	GGUUGGACCUUUGGUGCAGG	3.4	0.6	0.1581	32	20
24268	CDS	S	24	GGCUUAUAGGUUUAAUGGUAUUGG	16	0.625	0.0053	34	-
25197	CDS	S	22	GGCCAUGGUACAUUUGGCUAGG	2.6667	0.4545	0.0244	32	-
25951	CDS	ORF3a	29	GGUGGUUAUACUGAAAAAUGGGAAUCUGG	11.5	0.6897	0.2045	23	-
26746	CDS	M	43	GGAUCACCGGUGGAAUUGCUAUCGCAAUGGCUUGUCUUGUAGG	2.4	0.3256	0.1635	30	-
26746	CDS	M	30	GGAUCACCGGUGGAAUUGCUAUCGCAAUGG	2.25	0.3333	0.0868	22	-
28346	CDS	N	31	GGCAGUAACCAGAAUGGAGAACGCAGUGGGG	4.7143	0.7097	0.3974	23	-
28619	CDS	N	41	GGGCCAGAAGCUGGACUUCCCUAUGGUGCUAACAAAGACGG	1.3684	0.1707	0.0094	33	-
28781	CDS	N	29	GGCUUCUACGCAGAAGGGAGCAGAGGCGG	4.3333	0.6552	0.1175	24	-
28903	CDS	N	15	GGCUGGCAAUGGCGG	5.3333	0.8667	0.568	33	27
29123	CDS	N	35	GGAAAUUUUGGGGACCAGGAACUAAUCAGACAAGG	4.7143	0.6286	0.0488	28	21
29254	CDS	N	38	GGGAACGUGGUUGACCUACACAGGUGCCAUCAAAUUGG	2.0833	0.3158	0.3759	30	-
				PQSs with low probability to form G4
				PQSs with medium probability to form G4
				PQSs with high probability to form G4
				PQSs that present significantly high cGcC scores (> 150)
				Scores overpassing the defined threshold (G4RNA Screener)

## Sheet: RaTG13
G4RNA screener v0.2, Window length: 40, Window step: 10, Thresholds: cGcC > 4.5, G4H > 0.9, G4NN > 0.5 QGRS Mapper Max Length: 45 | Min G-Group Size: 2 | Loop size: from 1 to 15 PQS finder Max Length: 45 | Min G-Group Size: 2 | Min score: 20 | Loop size: from 1 to 15
Position	Region	Gene	Length	Sequence	G4RNA Screener			QGRS Mapper	PQS finder
					cGcC	G4H	G4NN
236	5´UTR		34	GGUUUCGUCCGGGUGUGACCGAAAGGUAAGAUGG	3	0.5	0.0571	31	-
353	CDS	ORF1ab	25	GGCUUUGGAGACUCCGUGGAGGAGG	3.6667	0.64	0.0214	31	21
545	CDS	ORF1ab	35	GGCAUUCAGUAUGGUCGUAGUGGUGAGACACUCGG	3.5	0.4286	0.0248	33	-
644	CDS	ORF1ab	20	GGUAAUAAAGGAGCUGGUGG	17	0.8	0.7006	33	20
1574	CDS	ORF1ab	26	GGUGUUGUUGGAGAAGGUUCUGAAGG	20	0.7308	0.548	33	-
1810	CDS	ORF1ab	27	GGCAAAGAAAGGUGCUUGGAACAUUGG	6	0.5556	0.2313	33	-
2035	CDS	ORF1ab	39	GGUUACUAACAAUCUGGUUGUAAUGGCUUACAUUACAGG	2.8333	0.2821	0.5403	30	-
3464	CDS	ORF1ab	16	GGAGGAGGUGUUGCGG	18	1.0625	0.8329	31	26
3545	CDS	ORF1ab	38	GGACCACUUAAAGUGGGUGGUGGCUGUGUUUUGAGUGG	5.1667	0.6316	0.1425	28	-
4253	CDS	ORF1ab	34	GGCCAGGGUUUAAAUGGUUAUACUGUAGAAGAGG	5	0.5588	0.0349	25	-
4484	CDS	ORF1ab	35	GGUAUUAAAAUACAAGAGGGUGUGGUUGAUUAUGG	25	0.6571	0.0362	25	-
4613	CDS	ORF1ab	42	GGCUAUGUAACACAUGGUUUAAAUUUGGAAGAAGCUGCUCGG	3.3333	0.3333	0.0111	32	-
5033	CDS	ORF1ab	32	GGACAACAGUUUGGCCCAACUUAUUUGGAUGG	1.3077	0.1563	0.0036	26	-
6509	CDS	ORF1ab	43	GGUUUGAAAAUUACAGAGGAGGUUGGUCACACAGAUCUAAUGG	4.6	0.4186	0.0638	26	-
7210	CDS	ORF1ab	41	GGAUUUAACUGCUUUUGGCUUAGUUGCAGAGUGGUUUUUGG	5.25	0.4146	0.0012	27	-
8684	CDS	ORF1ab	23	GGGUACAAGGCUAUCGAUGGUGG	7.6667	0.8261	0.1362	29	-
10055	CDS	ORF1ab	41	GGUUUUAGAAAAAUGGCAUUCCCAUCAGGUAAAGUUGAGGG	2.0833	0.3171	0.0066	34	-
10463	CDS	ORF1ab	35	GGUUCAUUCCUUAAUGGUUCUUGUGGUAGUGUUGG	3.1667	0.3714	0.1335	30	-
10546	CDS	ORF1ab	42	GGAAUUACCAACUGGAGUUCAUGCUGGCACAGACUUAGAAGG	2	0.2381	0.1636	33	-
11372	CDS	ORF1ab	18	GGUGCUAGGAGGGUGUGG	24	1.2222	0.8849	33	23
13382	CDS	ORF1ab	20	GGUAUGUGGAAAGGUUAUGG	170	0.85	0.022	34	20
14470	CDS	ORF1ab	40	GGAUACCACUUCAGGGAGCUAGGUGUUGUACAUAAUCAGG	2.7778	0.375	0.5178	27	-
18052	CDS	ORF1ab	36	GGACUUUUUAAGGAUUGUAGUAAGGUAAUCACUGGG	8	0.5556	0.0412	35	-
18293	CDS	ORF1ab	23	GGAUUGGCUUUGAUGUCGAGGGG	15.5	1.087	0.2233	24	-
20329	CDS	ORF1ab	29	GGAGAUUUUAGUCAUAGGCAGUUAGGUGG	9.5	0.5862	0.0361	23	-
20866	CDS	ORF1ab	32	GGUGCUGGUUCUGAUAAAGGAGUUGCACCUGG	2.8571	0.4063	0.5798	30	-
22313	CDS	S	29	GGUGAUUCUUCUUCAGGUUGGACAGCUGG	3.6	0.4483	0.1218	25	-
24200	CDS	S	20	GGUUGGACUUUUGGUGCAGG	8.5	0.75	0.0162	32	20
24253	CDS	S	24	GGCUUAUAGGUUUAAUGGUAUUGG	16	0.625	0.0053	34	-
25182	CDS	S	22	GGCCAUGGUACAUUUGGCUAGG	2.6667	0.4545	0.0244	32	-
25936	CDS	NS3	29	GGUGGUUAUACUGAAAAAUGGGAGUCUGG	12	0.7241	0.1523	23	-
26728	CDS	M	43	GGAUCACUGGAGGAAUCGCUAUCGCAAUGGCUUGUCUUGUAGG	3	0.3721	0.2419	30	-
28600	CDS	N	41	GGGCCAGAAGCUGGACUUCCCUAUGGUGCUAACAAAGACGG	1.3684	0.1707	0.0094	33	-
28762	CDS	N	29	GGCUUCUACGCAGAAGGGAGCAGAGGUGG	5.2	0.6897	0.1433	24	-
28880	CDS	N	16	GGAUGGCUGGCAAUGG	8	0.875	0.7748	34	26
29104	CDS	N	35	GGAAACUUUGGGGAUCAAGAACUAAUCAGGCAAGG	6.6	0.6857	0.2203	24	-
29235	CDS	N	38	GGGAACGUGGUUGACCUAUACAGGUGCCAUUAAAUUGG	2.5	0.3684	0.1584	30	-
			PQSs with low probability to form G4
			PQSs with medium probability to form G4
			PQSs with high probability to form G4
			PQSs that present significantly high cGcC scores (> 150)
			Scores overpassing the defined threshold (G4RNA Screener)

## Sheet: Bat_C21
G4RNA screener v0.2, Window length: 40, Window step: 10, Thresholds: cGcC > 4.5, G4H > 0.9, G4NN > 0.5 QGRS Mapper Max Length: 45 | Min G-Group Size: 2 | Loop size: from 1 to 15 PQS finder Max Length: 45 | Min G-Group Size: 2 | Min score: 20 | Loop size: from 1 to 15
Position	Region	Gene	Length	Sequence	G4RNA Screener			QGRS Mapper	PQS finder
					cGcC	G4H	G4NN
352	CDS	ORF1ab	25	GGCUUUGGAGACUCCGUAGAGGAGG	3.1667	0.52	0.0067	10	-
643	CDS	ORF1ab	20	GGUAAUAAAGGAGCUGGUGG	17	0.8	0.7006	15	20
1462	CDS	ORF1ab	26	GGUGGUCGUACCAUUGCUUAUGGGGG	7.5	0.9231	0.3342	6	-
1809	CDS	ORF1ab	28	GGCUAAGAAGGGUGCCUGGAACAUUGGG	5	0.7857	0.5179	20	22
3195	CDS	ORF1ab	30	GGAUUGGUUAGAAUCUGAUAGUCAGGACGG	6.3333	0.5333	0.5748	6	-
3385	CDS	ORF1ab	17	GGAGGAGGUGUUGCUGG	18	1	0.8378	15	24
4422	CDS	ORF1ab	21	GGAGGGUGUGGUUGACUAUGG	24	1.0476	0.2131	15	-
6277	CDS	ORF1ab	19	GGGGACACACAGGGAAUGG	11.3333	1.3684	0.984	14	22
8468	CDS	ORF1ab	26	GGGGUGGUAAAAUUGUUAACAACUGG	14.5	0.8846	0.7489	4	-
8608	CDS	ORF1ab	23	GGAUACAAGGCUAUUGAUGGUGG	8.5	0.6522	0.1148	14	-
10182	CDS	ORF1ab	30	GGCUGGUAAUGUUCAACUUAGGGUUGUUGG	8	0.6667	0.7462	9	-
11721	CDS	ORF1ab	29	GGGUAUUGGAGGUAAGCCAUGCAUUAAGG	4.8	0.6207	0.1441	7	-
12714	CDS	ORF1ab	20	GGGAGGUAGGUUUGUGCUGG	24	1.1	0.4431	15	21
13020	CDS	ORF1ab	31	GGCCUACAAAGAUUACUUGGCAAGUGGUGG	2.5714	0.3667	0.1192	6	-
13093	CDS	ORF1ab	22	GGUACUGGACAGGCAAUUACGG	4	0.5455	0.4915	17	-
13134	CDS	ORF1ab	21	GGACCAGGAGUCCUUUGGUGG	2.125	0.4286	0.0259	14	-
13306	CDS	ORF1ab	20	GGAAUGUGGAAAGGUUAUGG	170	0.85	0.2347	19	20
13532	CDS	ORF1ab	18	GGAAAAGGAUGAGGAAGG	170	0.9444	0.7779	19	23
13991	CDS	ORF1ab	30	GGAUCUUAAUGGGAACUGGUACGAUUUCGG	5.75	0.6	0.1881	17	-
14868	CDS	ORF1ab	28	GGUUUCCCAUUCAACAAAUGGGGUAAGG	2.3333	0.4643	0.0137	4	-
15129	CDS	ORF1ab	27	GGAACAAGUAAAUUUUAUGGUGGCUGG	8.5	0.5556	0.004	6	-
20018	CDS	ORF1ab	30	GGCUAGUGUCAACGGGGUCACAUUAAUUGG	6	0.7	0.4442	10	-
20253	CDS	ORF1ab	29	GGAGAUUUUAGUCAUGGACAAUUAGGCGG	6	0.5172	0.0124	9	-
21784	CDS	S	16	GGGGCUGGAUCUUUGG	14	1.375	0.5155	15	26
22685	CDS	S	30	GGUCAGACAAGUGGCACCAGGACAGACUGG	2.1111	0.3333	0.168	16	-
24051	CDS	S	20	GGAUGGACCUUUGGUGCUGG	3.4	0.6	0.1548	17	20
25033	CDS	S	22	GGCCAUGGUAUGUUUGGCUCGG	2.8333	0.5	0.0062	17	-
25790	CDS	protein 3	26	GGUUACACGGAAAAGUGGGAGUCUGG	8	0.7692	0.6949	21	-
26582	CDS	M	30	GGAUCACUGGUGGAAUUGCCAUUGCAAUGG	2.5714	0.3667	0.2619	7	-
28617	CDS	N	29	GGCUUCUACGCAGAAGGGAGCAGAGGCGG	4.3333	0.6552	0.1175	9	-
28739	CDS	N	15	GGCUGGCAAUGGCGG	5.3333	0.8667	0.568	18	27
29070	3´UTR	N	30	GGCAUGGAAGUCACACCUUCGGGAACAUGG	2.5556	0.4333	0.5113	11	-
				PQSs with low probability to form G4
				PQSs with medium probability to form G4
				PQSs with high probability to form G4
				PQSs that present significantly high cGcC scores (> 150)
				Scores overpassing the defined threshold (G4RNA Screener)

## Sheet: Bat_C45
G4RNA screener v0.2, Window length: 40, Window step: 10, Thresholds: cGcC > 4.5, G4H > 0.9, G4NN > 0.5 QGRS Mapper Max Length: 45 | Min G-Group Size: 2 | Loop size: from 1 to 15 PQS finder Max Length: 45 | Min G-Group Size: 2 | Min score: 20 | Loop size: from 1 to 15
Position	Region	Gene	Length	Sequence	G4RNA Screener			QGRS Mapper	PQS finder
					cGcC	G4H	G4NN
643	CDS	ORF1ab	20	GGUAAUAAAGGAGCUGGUGG	17	0.8	0.7006	15	20
1462	CDS	ORF1ab	26	GGUGGUCGUACCAUUGCUUAUGGGGG	7.5	0.9231	0.3342	6	-
3195	CDS	ORF1ab	30	GGAUUGGUUAGAAUCUGAUAGUCAGGACGG	6.3333	0.5333	0.5748	6	-
3451	CDS	ORF1ab	17	GGAGGAGGUGUUGCUGG	18	1	0.8378	15	24
3533	CDS	ORF1ab	22	GGCCACUAAUUGUGGGUGGUGG	4.6	0.7727	0.4276	11	-
4488	CDS	ORF1ab	21	GGAGGGUGUGGUUGAUUAUGG	240	1.0952	0.3178	15	-
6336	CDS	ORF1ab	26	GGAAUUAGGGGACACACAGGGAAUGG	12.6667	1.1538	0.959	18	21
8674	CDS	ORF1ab	23	GGAUACAAGGCUAUUGAUGGUGG	8.5	0.6522	0.1148	14	-
11787	CDS	ORF1ab	29	GGGCAUUGGAGGUAAACCUUGUAUUAAGG	4.6	0.5862	0.1471	7	-
12255	CDS	ORF1ab	20	GGAAAAGAUGGCGGAUCAGG	8.5	0.75	0.2905	15	20
12970	CDS	ORF1ab	22	GGUAUGGUACUGGGUAGUUUGG	23	0.9545	0.0229	18	-
13159	CDS	ORF1ab	22	GGUACAGGACAGGCAAUCACGG	3.2	0.5	0.6246	17	-
13372	CDS	ORF1ab	20	GGAAUGUGGAAAGGUUAUGG	170	0.85	0.2347	19	20
14057	CDS	ORF1ab	30	GGAUCUGAAUGGGAAUUGGUACGACUUCGG	6	0.6333	0.4123	17	-
14934	CDS	ORF1ab	28	GGUUUCCCAUUUAAUAAGUGGGGUAAGG	2.9	0.5714	0.0185	4	-
15188	CDS	ORF1ab	31	GGUAAUUGGAACAAGCAAAUUUUAUGGUGG	8.5	0.5	0.0045	6	-
15435	CDS	ORF1ab	29	GGCGGCUCAUUAUAUGUGAAACCAGGUGG	2.5714	0.3793	0.0146	3	-
20319	CDS	ORF1ab	29	GGAGAUUUUAGUCAUGGACAAUUAGGCGG	6	0.5172	0.0124	9	-
20364	CDS	ORF1ab	22	GGACUGGCCAAAAGGUCACAGG	2.2857	0.4091	0.2495	18	-
21853	CDS	S	16	GGGGCUGGAUCUUUGG	14	1.375	0.5155	15	26
22763	CDS	S	21	GGUGGCACCAGGACAAACUGG	2.2857	0.4286	0.5172	15	-
24120	CDS	S	20	GGAUGGACCUUUGGUGCUGG	3.4	0.6	0.1548	17	20
24173	CDS	S	24	GGCUUAUAGGUUUAAUGGAAUUGG	16	0.625	0.0423	19	-
25102	CDS	S	22	GGCCAUGGUAUGUUUGGCUCGG	2.8333	0.5	0.0062	17	-
25867	CDS	protein 3	26	GGAAAAGUGGGAGUCUGGUGUUAAGG	25	0.8846	0.8038	21	-
26651	CDS	M	30	GGAUCACUGGUGGAAUUGCCAUUGCAAUGG	2.5714	0.3667	0.2619	7	-
28686	CDS	N	29	GGCUUCUACGCAGAAGGGAGCAGAGGCGG	4.3333	0.6552	0.1175	9	-
28808	CDS	N	15	GGCUGGCAAUGGCGG	5.3333	0.8667	0.568	18	27
29139	CDS	N	31	GGCAUGGAAGUCACACCUUCGGGAACAUGG	2.5556	0.4333	0.5106	11	-
				PQSs with low probability to form G4
				PQSs with medium probability to form G4
				PQSs with high probability to form G4
				PQSs that present significantly high cGcC scores (> 150)
				Scores overpassing the defined threshold (G4RNA Screener)

## Sheet: SARS_CoV
G4RNA screener v0.2, Window length: 40, Window step: 10, Thresholds: cGcC > 4.5, G4H > 0.9, G4NN > 0.5 QGRS Mapper Max Length: 45 | Min G-Group Size: 2 | Loop size: from 1 to 15 PQS finder Max Length: 45 | Min G-Group Size: 2 | Min score: 20 | Loop size: from 1 to 15
Position	Region	Gene	Length	Sequence	G4RNA Screener			QGRS Mapper	PQS finder
					cGcC	G4H	G4NN
235	5' UUR		34	GGUUUCGUCCGGGUGUGACCGAAAGGUAAGAUGG	3	0.5	0.0571	31	-
360	CDS	ORF1ab-nsp1	26	GGACUCUGUGGAAGAGGCCCUAUCGG	1.3846	0.2308	0.0097	33	-
409	CDS	ORF1ab-nsp1	32	GGCACUUGUGGUCUAGUAGAGCUGGAAAAAGG	5	0.5	0.1316	29	-
508	CDS	ORF1ab-nsp1	34	GGCCACAAGGUCGUUGAGCUGGUUGCAGAAAUGG	2.625	0.3824	0.2402	32	-
544	CDS	ORF1ab-nsp1	34	GGCAUUCAGUACGGUCGUAGCGGUAUAACACUGG	2.7143	0.3529	0.0556	33	-
643	CDS	ORF1ab-nsp1	32	GGUAAUAAGGGAGCCGGUGGUCAUAGCUAUGG	4.6667	0.6563	0.208	33	20
1461	CDS	ORF1ab-nsp2	24	GGGAGGUAGGACUAGAUGUUUUGG	24	0.9167	0.0329	26	-
1564	CDS	ORF1ab-nsp2	31	GGCCAUACUGGCAUUACUGGUGACAAUGUGG	2.25	0.3226	0.358	34	-
1804	CDS	ORF1ab-nsp2	32	GGAAAGCCCGUAAAAGGUGCUUGGAACAUUGG	1.5833	0.25	0.1072	28	-
2160	CDS	ORF1ab-nsp2	40	GGCGAAACUUAGUGCAGGAGUUGAAUUUCUCAAGGAUGCU	3	0.3	0.0938	28	-
2716	CDS	ORF1ab-nsp2/3	40	GGUGCACCAAUUAAAGGUGUAACCUUUGGAGAAGAUACUG	1.7	0.175	0.0909	32	-
3118	CDS	ORF1ab-nsp3	34	GGUACAGAGGAUGAUUAUCAAGGUCUCCCUCUGG	1.2857	0.1471	0.0124	31	-
3186	CDS	ORF1ab-nsp3	26	GGAAGAAGAAGAGGAAGACUGGCUGG	10	0.6923	0.0728	28	-
3415	CDS	ORF1ab-nsp3	40	GGUGCACUCAACAAGGCAACCAAUGGUGCCAUGCAAAAGG	1.3571	0.125	0.3053	32	-
3481	CDS	ORF1ab-nsp3	38	GGCCCUCUUACAGUAGGAGGGUCUUGUUUGCUUUCUGG	1.6667	0.2632	0.0225	23	-
4183	CDS	ORF1ab-nsp3	31	GGACAAGGAUGUGCUGGUUAUACACUUGAGG	4.75	0.4839	0.3746	28	-
4713	CDS	ORF1ab-nsp3	33	GGCUGGCUCUUACAGAGAUUGGUCCUAUUCAGG	2	0.2727	0.0031	24	-
4966	CDS	ORF1ab-nsp3	32	GGACAGCAGUUUGGUCCAACAUACUUGGAUGG	2.25	0.3125	0.1076	26	-
6466	CDS	ORF1ab-nsp3	31	GGUCAUGAGGAUCUUAUGGCUGCUUAUGUGG	4.75	0.4839	0.0489	32	-
7159	CDS	ORF1ab-nsp3	25	GGUCUGGCCGCUGAGUGGGUUUUGG	4.1667	0.72	0.0239	30	-
8692	CDS	ORF1ab-nsp4	32	GGUUUUGACGCAUGGUUUAGCCAGCGUGGUGG	3	0.4375	0.0122	25	-
9339	CDS	ORF1ab-nsp4	26	GGCUGGUGGUAUUAUUGCCAUAUUGG	3.4	0.4615	0.0013	22	-
9988	CDS	ORF1ab-nsp5	40	GGUUUUAGGAAAAUGGCAUUCCCGUCAGGCAAAGUUGAAG	1.5385	0.25	0.0093	35	-
10396	CDS	ORF1ab-nsp5	35	GGUUCUUUCCUUAAUGGAUCAUGUGGUAGUGUUGG	3.1667	0.3714	0.0878	30	-
10492	CDS	ORF1ab-nsp5	40	GGAGUACACGCUGGUACUGACUUAGAAGGUAAAUUCUAUG	2.8333	0.3	0.0429	33	-
11731	CDS	ORF1ab-nsp6	28	GGUAUUGGAGGUAAACCAUGUAUCAAGG	3.4	0.4286	0.0156	22	-
12078	CDS	ORF1ab-nsp8	30	GGAGGCCUAUGAGCAGGCUGUAGCUAAUGG	2.8571	0.4333	0.0425	26	-
12723	CDS	ORF1ab-nsp9	20	GGGAGGUAGGUUUGUGCUGG	24	1.1	0.4431	30	21
13315	CDS	ORF1ab-nsp10	20	GGAAUGUGGAAAGGUUAUGG	170	0.85	0.2347	34	20
13541	CDS	ORF1ab	18	GGAGAAGGAUGAGGAAGG	180	1	0.6804	34	23
14000	CDS	ORF1ab	30	GGAUCUUAAUGGGAACUGGUACGAUUUCGG	5.75	0.6	0.1881	32	-
19923	CDS	ORF1ab-nsp15	19	GGUAGAGUGGAAGGACAGG	18	0.8947	0.55	32	21
20262	CDS	ORF1ab-nsp15	29	GGAGAUUUCAGUCAUGGACAACUUGGCGG	3.6	0.4483	0.0179	24	-
20799	CDS	ORF1ab-nsp16	32	GGUGCUGGCUCUGAUAAAGGAGUUGCACCAGG	2.5	0.375	0.6123	30	-
21212	CDS	ORF1ab-nsp16	39	GGCUAACUAUCUUGGCAAGCCGAAGGAACAAAUUGAUGG	2.1111	0.2564	0.0551	34	-
24090	CDS	S	20	GGAUGGACAUUUGGUGCUGG	8.5	0.75	0.1282	32	20
24143	CDS	S	24	GGCAUAUAGGUUCAAUGGCAUUGG	5.3333	0.5417	0.0902	34	-
24401	CDS	S	33	GGCGGAGGUACAAAUUGACAGGUUAAUUACAGG	5.25	0.5152	0.4394	28	-
25072	CDS	S	22	GGCCUUGGUAUGUUUGGCUCGG	2.8333	0.5	0.0054	32	-
25829	CDS	sars3a	26	GGUUAUUCUGAGGAUAGGCACUCAGG	4.25	0.5	0.0904	30	-
26618	CDS	M	42	GGGUGACUGGCGGGAUUGCGAUUGCAAUGGCUUGUAUUGUAGG	6.8	0.675	0.1622	32	-
26627	CDS	M	30	GGGUGACUGGCGGGAUUGCGAUUGCAAUGG	8	0.8667	0.5533	24	24
26833	CDS	M	32	GGUCACUUGCGAAUGGCCGGACACUCCCUAGG	0.9474	0	0.0238	26	-
28023	CDS	sars8b	38	GGUGCGCUUAUAGCUAGGUGUUGGUACCUUCAUGAAGG	2.625	0.3421	0.1342	26	-
28210	CDS	N	21	GGAGGACGCAAUGGGGCAAGG	11	1.2381	0.9668	30	26
28492	CDS	N	40	GGCGCUAACAAAGAAGGCAUCGUAUGGGUUGCAACUGAGG	3.8571	0.525	0.175	32	-
28630	CDS	N	29	GGCUUCUACGCAGAGGGAAGCAGAGGCGG	4.3333	0.6552	0.1175	25	-
28752	CDS	N	15	GGCUAGCGGAGGUGG	8.5	1	0.4007	32	27
29103	CDS	N	38	GGGAACAUGGCUGACUUAUCAUGGAGCCAUUAAAUUGG	3	0.3947	0.1046	30	-
				PQSs with low probability to form G4
				PQSs with medium probability to form G4
				PQSs with high probability to form G4
				PQSs that present significantly high cGcC scores (> 150)
				Scores overpassing the defined threshold (G4RNA Screener)

## Sheet: MERS-CoV
G4RNA screener v0.2, Window length: 40, Window step: 10, Thresholds: cGcC > 4.5, G4H > 0.9, G4NN > 0.5 QGRS Mapper Max Length: 45 | Min G-Group Size: 2 | Loop size: from 1 to 15 PQS finder Max Length: 45 | Min G-Group Size: 2 | Min score: 20 | Loop size: from 1 to 15
Position	Region	Gene	Length	Sequence	G4RNA Screener			QGRS Mapper	PQS finder
					cGcC	G4H	G4NN
244	5´UTR		28	GGUUUCGUCCGGUGCGUGGCAAUUCGGG	3.125	0.5714	0.0269	18	-
290	CDS	ORF1ab-nsp1	30	GGCUGGUGUGACCGCGCAAGGUGCGCGCGG	2.3	0.4333	0.5191	10	-
618	CDS	ORF1ab-nsp1	28	GGCAGCCUGGUUGGCACAACUUUGCAGG	2	0.3214	0.0927	11	-
787	CDS	ORF1ab-nsp1	21	GGAUGGACGAUUUUGAGGCGG	9	0.7619	0.0097	12	-
929	CDS	ORF1ab-nsp2	26	GGCCAAGGAUGGAAUAACCAAACUGG	1.7778	0.2692	0.6008	11	-
1339	CDS	ORF1ab-nsp2	21	GGUUUGCCUGUGGAUGUGGGG	7.75	1.0952	0.4817	12	-
1659	CDS	ORF1ab-nsp2	25	GGCUGUACUGGCUCUUGGAACAAGG	3.4	0.48	0.5047	19	-
1895	CDS	ORF1ab-nsp2	30	GGAUAAUGCUAUUAAUGUUGGUGGUACAGG	9	0.5333	0.229	5	-
2347	CDS	ORF1ab-nsp2	19	GGUUUGUGGUGGUCAAUGG	17	0.8421	0.1028	17	21
3735	CDS	ORF1ab-nsp3	17	GGCGGUGGUAUCGCUGG	5.6667	0.8235	0.0579	15	24
4982	CDS	ORF1ab-nsp3	26	GGCUGCAGUCCAUGGGUGGAAGAUGG	4.1667	0.6923	0.3065	12	-
5276	CDS	ORF1ab-nsp3	30	GGUUUGGAGAGAGUGGUGCAAUGUCUGUGG	11	0.6667	0.0511	12	-
7138	CDS	ORF1ab-nsp3	31	GGUUGUGGUUUGCAUUUGAGACUGGUUUGG	10	0.6	0.0056	9	-
7187	CDS	ORF1ab-nsp3	27	GGCCUUCAACUGGUUGUUGUUGGCAGG	2.5714	0.4074	0.376	14	-
7544	CDS	ORF1ab-nsp3	25	GGAUUGUGACACUGCAGGUGUGGGG	10.6667	1	0.8418	7	-
10061	CDS	ORF1ab-nsp5	27	GGCUUGUAUGGUUCAGGUUACCUGCGG	2.5714	0.4074	0.0699	17	-
10464	CDS	ORF1ab-nsp5	26	GGUAGUGUUGGUUACACCAAGGAGGG	4.8	0.6923	0.8777	14	-
11772	CDS	ORF1ab-nsp6	28	GGUAUUGGCGGUACACCUUGUAUAAAGG	2.8333	0.3929	0.0134	7	-
12815	CDS	ORF1ab-nsp9	24	GGCGCGUGUUGAAGGUAAGGACGG	6.6667	0.7083	0.819	12	-
13531	CDS	ORF1ab-nsp12	21	GGCUAAGGUUGCUGGUAUUGG	8.5	0.7143	0.0573	20	-
13999	CDS	ORF1ab-nsp12	21	GGUCAAGGCUGGUUUAGUCGG	5.6667	0.6667	0.1384	16	-
14041	CDS	ORF1ab-nsp12	30	GGACCUUAAUGGCAAGUGGUAUGAUUUUGG	3.6	0.4333	0.0074	17	-
14680	CDS	ORF1ab-nsp12	27	GGUAUCUAAAGGUUUCUUUAAGGAGGG	11	0.7037	0.0108	14	-
15179	CDS	ORF1ab-nsp12	28	GGUACUACAAAGUUCUACGGUGGCUGGG	4.6	0.6071	0.2544	6	-
15422	CDS	ORF1ab-nsp12	26	GGUGGUUACUACGUCAAACCUGGAGG	2.4286	0.3846	0.3345	6	-
18235	CDS	ORF1ab-nsp14	30	GGCUGUAAGGCAAGUUCGAAGCUGGAUAGG	5	0.5333	0.617	11	-
20559	CDS	ORF1ab-nsp15	18	GGUGUAAGGAUGGACAGG	17	0.8889	0.9182	18	23
20569	CDS	ORF1ab-nsp15	26	GGCUCAGUUGUGGAACAGGCUGAAGG	4.75	0.5769	0.5724	16	-
23103	CDS	S	12	GGUGGUGGCUGG	16	1.25	0.7801	20	32
24324	CDS	S	20	GGUGUUGGCUGGACUGCUGG	6	0.75	0.717	17	20
24391	CDS	S	30	GGUUAAACGGUGUUGGCAUUACUCAACAGG	3.4	0.4	0.5137	13	-
25339	CDS	S	22	GGCCGUGGUACAUUUGGCUUGG	2.8333	0.5	0.0288	17	-
26091	CDS	ORF4a	21	GGAUGGAGGAAUCCCUGAUGG	1.7	0.381	0.1535	12	-
28151	CDS	M	29	GGCUGUUUAUGAGAACUGGAUCAUGGUGG	6.3333	0.5517	0.0218	7	-
28791	CDS	N	19	GGGUAUUGGCGGAGACAGG	11.5	1.0526	0.0282	17	23
28827	CDS	N	30	GGGAAUGGAAUUAAGCAACUGGCUCCCAGG	1.7692	0.3333	0.1579	13	-
28906	CDS	N	26	GGGCUGUUAAGGAUGGCAUCGUUUGG	8	0.7692	0.685	15	-
29054	CDS	N	12	GGGGACUGGAGG	28	1.9167	0.9903	18	32	*
29169	3´UTR	N	26	GGUCCAUCUGGAAUCGGAGCAGUAGG	2.5714	0.4231	0.2761	18	-
29364	3´UTR	N	28	GGUCUUCGCGGACCAGGAGACCUCCAGG	1.2	0.1071	0.0644	16	-
				PQSs with low probability to form G4
				PQSs with medium probability to form G4
				PQSs with high probability to form G4
				PQSs that present significantly high cGcC scores (> 150)
				Scores overpassing the defined threshold (G4RNA Screener)
