# Supplementary material for: CNBP Binds and Unfolds In Vitro G-Quadruplexes Formed in the SARS-CoV-2 Positive and Negative Genome Strands
Source: Int J Mol Sci. 2021 Mar 5;22(5):2614. doi: 10.3390/ijms22052614 (PMC7961906; doi:10.3390/ijms22052614)
Supplement: Supplementary file 1 [file ijms-22-02614-s001.zip › Supplementary Table S2-Proofreading.xlsx]

## Sheet: SARS-CoV-2
Table S2. PQS predicted in −gRNA of the SARS-CoV-2 and other members of the Coronaviridae family
G4RNA screener v0.2, Window length: 40, Window step: 10, Thresholds: cGcC > 4.5, G4H > 0.9, G4NN > 0.5 QGRS Mapper Max Length: 45 | Min G-Group Size: 2 | Loop size: from 1 to 15 PQS finder Max Length: 45 | Min G-Group Size: 2 | Min score: 20 | Loop size: from 1 to 15
Position −gRNA	Position +gRNA	Region	Gene	Length	Sequence		G4RNA Screener		QGRS Mapper	PQS finder
						cGcC	G4H	G4NN
165	29739	3´UTR		22	GGCCUCGGUGAAAAUGUGGUGG	3.6	0.5909	0.2217	28	-
1384	28520	CDS	N	31	GGUCAUCUGGACUGCUAUUGGUGUUAAUUGG	4.5	0.4516	0.0743	33	-
1733	28171	CDS	N	34	GGUUCCUGGCAAUUAAUUGUAAAAGGUAAACAGG	2.8333	0.3235	0.1298	26	-
2987	26917	CDS	M	29	GGUCUGGUCAGAAUAGUGCCAUGGAGUGG	3.3333	0.4828	0.2339	24	-
3297	26607	CDS	M	38	GGAAUAGGAAACCUAUUACUAGGUUCCAUUGUUCAAGG	1.7	0.1842	0.0283	27	-
3712	26192	CDS	ORF3a	43	GGUUCAUCAUAAAUUGGUUCCAUUACUGGAUUAACAACUCCGG	1.2308	0.0698	0.0567	33	-
4083	25821	CDS	ORF3a	31	GGCAUCAUAAAGUAAUGGGUUUUUGGAACGG	7.6667	0.6129	0.0284	25	-
11440	18464	CDS	ORF1ab-nsp16	25	GGCGGUGGUUUAGCACUAACUCUGG	3.4	0.48	0.0837	22	-
13134	16768	CDS	ORF1ab-nsp13	19	GGUUAAGUGGUGGUCUAGG	17	0.8421	0.7926	31	21
13963	15941	CDS	ORF1ab-nsp12	18	GGAUCUGGGUAAGGAAGG	22	1.1111	0.9722	34	23
16623	13281	CDS	ORF1ab-nsp10	27	GGAUUUGGAUGAUCUAUGUGGCAACGG	6	0.5556	0.0337	29	-
17784	12120	CDS	ORF1ab-nsp8	37	GGAAGGGAACUAAACUCUGAGGCUAUAGCUUGUAAGG	5	0.5135	0.2047	26	-
19865	10039	CDS	ORF1ab-nsp4	25	GGUGAUAGAGGUUUGUGGUGGUUGG	230	0.92	0.2852	34	26
23877	6027	CDS	ORF1ab-nsp3	17	GGAUAUGGUUGGUUUGG	160	0.9412	0.0217	34	24
25003	4901	CDS	ORF1ab-nsp3	16	GGUGGAAUGUGGUAGG	170	1.0625	0.8456	32	26
27432	2472	CDS	ORF1ab-nsp2	40	GGGGCUUUUAGAGGCAUGAGUAGGCCAGUUUCUUCUCUGG	4	0.575	0.0111	30	-
28690	1214	CDS	ORF1ab-nsp2	37	GGCACAUUUGGUUGCAUUCAUUUGGUGACGCAACUGG	2.7143	0.3243	0.0184	31	-
28802	1102	CDS	ORF1ab-nsp2	44	GGAAUUUAAGGGAAAUACAAAAUUUGGACAUUCCCCAUUGAAGG	1.0455	0.0909	0.0059	29	-
29867	37	5´UTR		23	GGUUGGUUUGUUACCUGGGAAGG	5.75	0.7826	0.5672	28	-
					PQSs with low probability to form G4
					PQSs with medium probability to form G4
					PQSs with high probability to form G4
					PQSs that present significantly high cGcC scores (> 150)
					Scores overpassing the defined threshold (G4RNA Screener)

## Sheet: RaTG13
G4RNA screener v0.2, Window length: 40, Window step: 10, Thresholds: cGcC > 4.5, G4H > 0.9, G4NN > 0.5 QGRS Mapper Max Length: 45 | Min G-Group Size: 2 | Loop size: from 1 to 15 PQS finder Max Length: 45 | Min G-Group Size: 2 | Min score: 20 | Loop size: from 1 to 15
Position −gRNA	Position +gRNA	Region	Gene	Length	Sequence		G4RNA Screener		QGRS Mapper	PQS finder
						cGcC	G4H	G4NN
136	29720	3´UTR		21	GCCUCGGUGAAAAUGUGGUGG	3	0.4762	0.2042	28	-
1355	28501	CDS	N	31	GGUCAUCUGGACUGCUAUUGGUAUUAAUCGG	3.4	0.3871	0.0125	33	-
1562	28294	CDS	N	23	GGGGUGCAUUUCGUUGGUUUUGG	15	1.0435	0.0059	25	-
1704	28152	CDS	NS8	34	GGCUCCUGGCAAUUAAUUGUAAAAGGUGAACAGG	2.5714	0.3235	0.1629	26	-
1869	27987	CDS	NS8	30	GGACACGGGUCAUCAACUACAUAUGGUUGG	3.6667	0.5	0.204	23	-
2957	26899	CDS	M	29	GGUCUGGUCAAAAUAGUGCCAUGGAGUGG	3.1667	0.4483	0.2745	24	-
3679	26177	CDS	NS3	43	GGUUCAUCAUAAAUUGGUUCCAUUGCUGGAUUAACAACUCCGG	1.3077	0.093	0.0574	33	-
4157	25699	CDS	NS3	15	GGUAGAGGAAUGGGG	290	1.6667	0.8681	32	27
6404	23452	CDS	S	33	GGGAGUAAGUUGGUCUGCAUGGAUAGCAACAGG	6.5	0.6364	0.812	34	-
8101	21754	CDS	S	28	GGAACCAGGUCACAUUGGAGAAGAAAGG	3	0.4286	0.1152	33	-
8182	21674	CDS	S	43	GGUAAUAGACACCACGGGUGGAUGAGUUGGUGUAUGCAGGAGG	5	0.6279	0.404	34	-
11395	18461	CDS	ORF1ab	25	GGUGGUGGUUUAGCACUAACUCUGG	4.25	0.52	0.109	22	-
13091	16765	CDS	ORF1ab	19	GGUUAAGUGGUGGUCUAGG	17	0.8421	0.7926	31	21
13918	15938	CDS	ORF1ab	18	GGAUCCGGGUAAGGGAGG	7	1.2222	0.9162	34	23
19820	10036	CDS	ORF1ab	21	GGUGAUAGAGGUUUGUGGUGG	190	0.9048	0.164	30	-
22130	7726	CDS	ORF1ab	27	GGAAGACUGGUCAGUAGGAUUUAUUGG	9	0.5926	0.0078	35	-
23832	6024	CDS	ORF1ab	17	GGAUAAGGUUGGUUUGG	160	0.9412	0.5509	34	24
28507	1349	CDS	ORF1ab	24	GGGGUAGGUAACCACAAGUAGUGG	6	0.875	0.878	22	-
28642	1214	CDS	ORF1ab	37	GGCACAUUUGGUUGCAUUCAUUUGGUGAAGCAACUGG	3.1667	0.3514	0.0142	31	-
28754	1102	CDS	ORF1ab	27	GGAAUUUAGGGGGAAUACAAAAUUUGG	43	1	0.0811	25	-
					PQSs with low probability to form G4
					PQSs with medium probability to form G4
					PQSs with high probability to form G4
					PQSs that present significantly high cGcC scores (> 150)
					Scores overpassing the defined threshold (G4RNA Screener)

## Sheet: Bat_C21
G4RNA screener v0.2, Window length: 40, Window step: 10, Thresholds: cGcC > 4.5, G4H > 0.9, G4NN > 0.5 QGRS Mapper Max Length: 45 | Min G-Group Size: 2 | Loop size: from 1 to 15 PQS finder Max Length: 45 | Min G-Group Size: 2 | Min score: 20 | Loop size: from 1 to 15
Position −gRNA	Position +gRNA	Region	Gene	Length	Sequence		G4RNA Screener		QGRS Mapper	PQS finder
						cGcC	G4H	G4NN
159	29581	3´UTR		22	GGCCUCGGUGAGAACGUGGUGG	3.1667	0.5909	0.1882	28	-
1172	28561	CDS	N	29	GGAUUGCGGGUGCCAAUGUGGUCUUUUGG	4.1667	0.6207	0.031	33	-
1486	28247	CDS	N	30	GGGUAAGCCUUGGGGUCGACGUUGUUUAGG	6.3333	0.9	0.5687	23	-
1586	28147	CDS	N	23	GGUGCACUACUCUGGUUUUGGGG	7.25	0.913	0.0281	25	-
1726	28007	CDS	N	34	GGUUCCUGGCAAUUAAUUGUAAAAGGAGAACAGG	3	0.3529	0.085	26	-
4076	25657	CDS	S	31	GGCAUCAUAAAGUACAGGAUUCUUGGAGCGG	3.6	0.4194	0.2654	25	-
5165	24568	CDS	S	27	GGCGCUGACUGGGGAAAAGACAUUAGG	7.75	0.8519	0.4758	25	-
10989	18744	CDS	ORF1ab	29	GGCAGUGCUGGUCAUGGUUACUUUGAAGG	4.75	0.5172	0.1551	30	-
11348	18385	CDS	ORF1ab	25	GGAGGAGGUUUUGCAUUAACUCUGG	5.6667	0.56	0.0258	22	-
12725	17008	CDS	ORF1ab	19	GGUGGUCCUUGGAGUGUGG	4.5	0.7368	0.2603	32	21
13871	15862	CDS	ORF1ab	18	GGAUCUGGAUAAGGCAGG	8	0.7778	0.954	34	23
16587	13146	CDS	ORF1ab	27	GGACUCCUGGUCCAUAUUGGCUUCUGG	1.4545	0.1852	0.0057	33	-
19363	10370	CDS	ORF1ab	32	GGUCUCAUGGCACAUUGGUAAACACCAGAUGG	1.8889	0.25	0.1631	30	-
19789	9944	CDS	ORF1ab	15	GGUGGUUGGUAGAGG	170	1.1333	0.4789	33	27
22083	7650	CDS	ORF1ab	27	GGAAGACUGGUCAGUAGGAUUUAUUGG	9	0.5926	0.0078	35	-
23786	5947	CDS	ORF1ab	16	GGUAAGGUUGGUUUGG	160	1	0.2515	35	26
28520	1213	CDS	ORF1ab	37	GGCACAUUUGGUUGCAUUCAUUUGGUGAAGCAACAGG	3.1667	0.3514	0.0172	31	-
29489	244	5´UTR		40	GGACGAAACCAAGGUAUGCUGAUGAUCGGCUGCAACACGG	1.9091	0.25	0.2241	32	-
					PQSs with low probability to form G4
					PQSs with medium probability to form G4
					PQSs with high probability to form G4
					PQSs that present significantly high cGcC scores (> 150)
					Scores overpassing the defined threshold (G4RNA Screener)

## Sheet: Bat_C45
G4RNA screener v0.2, Window length: 40, Window step: 10, Thresholds: cGcC > 4.5, G4H > 0.9, G4NN > 0.5 QGRS Mapper Max Length: 45 | Min G-Group Size: 2 | Loop size: from 1 to 15 PQS finder Max Length: 45 | Min G-Group Size: 2 | Min score: 20 | Loop size: from 1 to 15
Position −gRNA	Position +gRNA	Region	Gene	Length	Sequence		G4RNA Screener		QGRS Mapper	PQS finder
						cGcC	G4H	G4NN
159	29644	3´UTR		22	GGCCUCGGUGAAAACGUGGUGG	3	0.5455	0.2639	28	-
1173	28630	CDS	N	29	GGAUUGCGGGUGCCAAUGUGGUCUUUCGG	3.5714	0.5862	0.091	33	-
1487	28316	CDS	N	30	GGGUAAGCCUUGGGGUCGACGUUGUUUAGG	6.3333	0.9	0.5687	23	-
1585	28218	CDS	N	24	GGGGUGCACUACGUUGGUUUUGGG	12	1.1667	0.1612	25	-
1727	28076	CDS	N	34	GGUUCCUGGCAAUUAAUUGUAAAAGGAGAACAGG	3	0.3529	0.085	26	-
4077	25726	CDS	S	31	GGCAUCAUAGAGUAAAGGAUUCUUGGAACGG	4.5	0.4516	0.2731	25	-
5166	24637	CDS	S	27	GGCGCUGACUGGGGAAAAGACAUUAGG	7.75	0.8519	0.4758	25	-
11352	18451	CDS	ORF1ab -	25	GGAGGAGGUUUUGCAUUAACUCUGG	5.6667	0.56	0.0258	22	-
12729	17074	CDS	ORF1ab	19	GGUGGUCCCUGGAGUGUGG	1.8	0.4737	0.0631	32	-
13875	15928	CDS	ORF1ab	18	GGAUCUGGAUAAGGCAGG	8	0.7778	0.954	34	23
19367	10436	CDS	ORF1ab	32	GGUCUCAUGGCACAUUGGUAAACACCAGAUGG	1.8889	0.25	0.1631	30	-
19793	10010	CDS	ORF1ab	15	GGUGGUUGGUAGAGG	170	1.1333	0.4789	33	27
22087	7716	CDS	ORF1ab	27	GGAAGACUGGUCAGUAGGAUUUAUUGG	9	0.5926	0.0078	35	-
23790	6013	CDS	ORF1ab	16	GGUAAGGUUGGUUUGG	160	1	0.2515	35	26
28590	1213	CDS	ORF1ab	37	GGCACAUUUGGUUGCAUUCAUUUGGUGAAGCAACAGG	3.1667	0.3514	0.0172	31	-
29559	244	5´UTR	N	40	GGACGAAACCAAGGUAUGCUGAUGAUCGGCUGCAACACGG	1.9091	0.25	0.2241	32	-
					PQSs with low probability to form G4
					PQSs with medium probability to form G4
					PQSs with high probability to form G4
					PQSs that present significantly high cGcC scores (> 150)
					Scores overpassing the defined threshold (G4RNA Screener)

## Sheet: SARS-CoV
G4RNA screener v0.2, Window length: 40, Window step: 10, Thresholds: cGcC > 4.5, G4H > 0.9, G4NN > 0.5 QGRS Mapper Max Length: 45 | Min G-Group Size: 2 | Loop size: from 1 to 15 PQS finder Max Length: 45 | Min G-Group Size: 2 | Min score: 20 | Loop size: from 1 to 15
Position −gRNA	Position +gRNA	Region	Gene	Length	Sequence		G4RNA Screener		QGRS Mapper	PQS finder
						cGcC	G4H	G4NN
1178	28574	CDS	N	29	GGAUUGCGGGUGCCAAUGUGGUCUUUGGG	5.1667	0.7931	0.257	33	25
1391	28361	CDS	N	33	GGACCACUAUUGGUGUUGAUUGGAACGCCCUGG	1.1875	0.1212	0.0295	35	-
1493	28259	CDS	N	29	GGUAAACCUUGGGGUCGGCGCUGUUUUGG	4.8571	0.7931	0.077	31	23
1590	28162	CDS	N	27	GGGGGGCACUACGUUGGUUUGAUUGGG	24	1.3333	0.796	29	39
2963	26789	CDS	M	29	GGUCUGGUCACAAUUGUCCCCCGGAGAGG	0.4737	-0.1724	0.0033	24	-
3268	26484	CDS	M	43	GGCUAGGAAUAGGAAACCUAUUACUAGGUUCCAUUGUUCCAGG	1.5	0.1628	0.0228	32	-
5079	24673	CDS	S	32	GGCGCUGUGGUGAAGUUCCUCUCCUGGGAUGG	2.3636	0.4375	0.1616	24	-
5128	24624	CDS	S	44	GGAAGACAACACCAUGCGGGGCUGCUUGUGGGAAGGACAUAAGG	4.6	0.7045	0.8509	31	21
6694	23058	CDS	S	31	GGUUCUUAAUAAGGUCAGUGGAUAAUUUUGG	8.5	0.4839	0.0657	31	-
6855	22897	CDS	S	32	GGGGUGCAAGGUUUGCCAUCAGGGGAGAAAGG	8.5	1.1563	0.5291	33	-
10999	18753	CDS	ORF1ab-nsp14	29	GGCAAUGUUGGUCAUGGUUACUCUGAAGG	4.5	0.4828	0.5611	30	-
11350	18402	CDS	ORF1ab-nsp14	16	GGUCACCUGGUGGAGG	3.2	0.6875	0.5003	31	26
11629	18123	CDS	ORF1ab-nsp14	28	GGUAGGUCAUGUCCUUUGGUAUGCCUGG	2	0.3214	0.0055	27	-
12252	17500	CDS	ORF1ab-nsp13	35	GGACAACGGCGACAAGUUCCAAGGAACAUGUCUGG	1.9	0.2571	0.3198	28	-
12361	17391	CDS	ORF1ab-nsp13	22	GGGGGGCUGGUAAUUGAGCAGG	33	1.4545	0.9272	28	32
13881	15871	CDS	ORF1ab	18	GGAUCUGGGUAAGGCAGG	11	1.0556	0.9516	34	23
16479	13273	CDS	ORF1ab-nsp10	29	GGUCAUUAGCACAAGUGGUAGGUAUUUGG	6	0.5172	0.0146	24	-
16541	13211	CDS	ORF1ab-nsp10	21	GGAUUUGGAUGGUCAAUGUGG	17	0.7619	0.0988	31	-
17668	12084	CDS	ORF1ab-nsp8	26	GGCCUCCUGGGCAGUGGCAUAAGCGG	2.1818	0.4615	0.2633	34	-
19347	10405	CDS	ORF1ab-nsp5	36	GGAAAGAACCUUUAAUGGUAUGAUUAGGUCUCAUGG	3	0.3333	0.023	28	-
19445	10307	CDS	ORF1ab-nsp5	38	GGUUGGAUACGGACAAAUUUAUACUUGGGUGUCUUAGG	6.75	0.5789	0.1812	30	-
20147	9605	CDS	ORF1ab-nsp4	36	GGCACAAUAGGAGAAAACAUGGCAAACCAUUGAAGG	2.25	0.2778	0.2512	31	-
22101	7651	CDS	ORF1ab-nsp3	32	GGUCAGUAGGGUUGAUUGGUCUUUUAAACUGG	8	0.625	0.0473	31	-
23801	5951	CDS	ORF1ab-nsp3	26	GGUUGAGUUGGUACAAGGUCUAUAGG	9	0.6154	0.1825	34	-
25937	3815	CDS	ORF1ab-nsp3	39	GGCUCCUCUUGUUUAGGUGCUUCCACUCUAGGCUUCAGG	1.2	0.0769	0.0164	28	-
26492	3260	CDS	ORF1ab-nsp3	20	GGUGUAGGUUCUGGUUCUGG	8.5	0.75	0.4945	36	20
28349	1403	CDS	ORF1ab-nsp2	35	GGUCCAAUCUCUGGGUCUUGACAGGCAGGACAUGG	2.7	0.4571	0.4674	34	-
29133	619	CDS	ORF1ab-nsp1	31	GGUAUGCAAUUGGGGUUUCGCCCACAUGUGG	2.3846	0.4839	0.0138	22	-
29713	39	5´UTR		25	GGUUGGUUGGCUUUUCCUGGGUAGG	5.2	0.8	0.0182	31	20
					PQSs with low probability to form G4
					PQSs with medium probability to form G4
					PQSs with high probability to form G4
					PQSs that present significantly high cGcC scores (> 150)
					Scores overpassing the defined threshold (G4RNA Screener)

## Sheet: MERS-CoV
G4RNA screener v0.2, Window length: 40, Window step: 10, Thresholds: cGcC > 4.5, G4H > 0.9, G4NN > 0.5 QGRS Mapper Max Length: 45 | Min G-Group Size: 2 | Loop size: from 1 to 15 PQS finder Max Length: 45 | Min G-Group Size: 2 | Min score: 20 | Loop size: from 1 to 15
Position −gRNA	Position +gRNA	Region	Gene	Length	Sequence		G4RNA Screener		QGRS Mapper	PQS finder
						cGcC	G4H	G4NN
244	29876	3´UTR		23	GGACAAGCGAUGGUGAGAUGGGG	16	1.1304	0.6112	27	-
338	29782	3´UTR		25	GGACCAGGCUGAACACUUGGACGGG	2.875	0.56	0.764	29	-
539	29581	3´UTR		45	GGGUCAAGUUUAAUGGCUCCACUGUACCGAAGGAAGUACACAGGG	2.4615	0.3778	0.204	31	-
1343	28777	CDS	N	23	GGGGUAGAAUUGGCAUUAAGAGG	30	1.087	0.3028	28	-
1379	28741	CDS	N	17	GGUGGAAAGGUAAGAGG	170	1	0.4659	32	24
1516	28604	CDS	N	30	GGCAAAGGAAACAGCACGAGGUGCAGCAGG	3.3333	0.4667	0.3443	29	-
1752	28368	CDS	M	27	GGGUUUGGCCACGGUGACUUCAUUAGG	3.2857	0.5556	0.0951	29	-
2298	27822	CDS	E	14	GGUGGUAGAGGGGG	440	2.0714	0.9621	33	30
2971	27149	CDS	ORF4	37	GGAUAACUAAGAAGGCUAUCAGGCAACUUCCAGUUGG	2	0.2432	0.0411	30	-
3228	26892	CDS	ORF5	26	GGAGAAACUGGGACUAGCUGGACGGG	7.5	0.9231	0.5203	31	21
3347	26773	CDS	ORF4b	36	GGAAGACCGUAUGGAGACAACAUCUACGGCCAAAGG	1.5833	0.1944	0.0407	28	-
3489	26631	CDS	ORF4b	21	GGGAGGCCACUAUGGUAAAGG	4.4	0.7619	0.0748	31	20
3748	26372	CDS	ORF4b	31	GGUACUCAGAAACAGGUUGGCCGCCAUAAGG	1.6364	0.2258	0.1744	26	-
3870	26250	CDS	ORF4b	30	GGUUGGACAAUAACACUAAGGUCUUCAUGG	3.2	0.3667	0.5094	25	-
3992	26128	CDS	ORF4a	25	GGAGGUAGAGGGAACAUCCAUCAGG	3.8333	0.64	0.3258	26	-
5003	25117	CDS	S	12	GGAGGAGGGAGG	220	1.75	0.9768	35	32
5067	25053	CDS	S	19	GGGAGGUAAUGGGCUCAGG	14	1.2632	0.8957	33	23
5265	24855	CDS	S	27	GGCCAUUAGGGGCAUUUACAACAAAGG	4	0.6296	0.1922	23	-
6141	23979	CDS	S	29	GGCGUAAAUUGGCACCAUGGAGAGCCUGG	1.9	0.3103	0.0779	34	-
6505	23615	CDS	S	45	GGAAUUAACAAGUCCUAGGACACAACCAACAGGUGUCUGAAGGGG	2.6923	0.4	0.5716	31	-
7069	23051	CDS	S	23	GGAUGGGACAAUGGAUACACAGG	7.3333	0.7826	0.9399	32	-
8036	22084	CDS	S	44	GGAGUGUGAUAAGUGGCAAAAGAAGUAUAGGAAUUGCCAGCAGG	4	0.4091	0.134	34	-
14209	15911	CDS	ORF1ab-nsp12	17	GGUCUGGAUAAGGAAGG	16	0.8824	0.9522	34	24
14639	15481	CDS	ORF1ab-nsp12	42	GGCAUAUGCAGUGGUGGCAUCUCCGCUACUGGUACCUCCAGG	1.2778	0.119	0.0381	31	-
15560	14560	CDS	ORF1ab-nsp12	26	GGCAAUGUGCAUGGCUGGAUCAGCGG	3.8	0.5385	0.4824	28	-
16811	13309	CDS	ORF1ab-nsp10	30	GGGUCACGGACACACUGAGCAGGGAUUUGG	5	0.7333	0.2735	29	-
18688	11432	CDS	ORF1ab-nsp6	17	GGCAAUGGGGCUUGAGG	14.5	1.3529	0.9049	31	24
19933	10187	CDS	ORF1ab-nsp5	37	GGCAUCAUAAUUAGGAUCAGACAACUGGUCAGCCGGG	2.4	0.3514	0.3074	32	-
20116	10004	CDS	ORF1ab-nsp4/5	25	GGUUAUGCUACAGUUGGGUGGUUGG	12	0.84	0.3055	25	-
20755	9365	CDS	ORF1ab-nsp4	31	GGUAGUCAAUUGGAAAUAAGUAAUAGGCUGG	9	0.5161	0.5453	26	-
20846	9274	CDS	ORF1ab-nsp4	31	GGUCUAUUAAGAUGGUGGUCAUUAAAAAUGG	8.5	0.4839	0.0207	26	-
21086	9034	CDS	ORF1ab-nsp4	27	GGAUCAUGGCAGUAUGGUGUCAUACGG	4.5	0.5185	0.1375	33	-
22496	7624	CDS	ORF1ab-nsp3	24	GGCCUGCGUAGGGCGGUAGUGAGG	4.3333	0.7917	0.5753	30	-
26614	3506	CDS	ORF1ab-nsp3	27	GGGCUGGAUAGUCUGAGGUGCAGACGG	6.5	0.7778	0.6748	30	-
26661	3459	CDS	ORF1ab-nsp3	42	GGACUUCAACAGUAUCAGGCACAACAGGAGUUUCCUGUAAGG	1.7273	0.1905	0.0226	28	-
27580	2540	CDS	ORF1ab-nsp2	43	GGACUUAGCCUUAGUGGUGACACAGUAAUAGGUUCCCGAUGGG	1.5882	0.2326	0.2305	32	-
28843	1277	CDS	ORF1ab-nsp2	22	GGAGUGGUAAAUGUAGGUUGGG	240	1.0455	0.8302	31	-
29574	546	CDS	ORF1ab-nsp1	23	GGUACACACGAGGACCUGGGAGG	3.2857	0.6522	0.6826	29	-
					PQSs with low probability to form G4
					PQSs with medium probability to form G4
					PQSs with high probability to form G4
					PQSs that present significantly high cGcC scores (> 150)
					Scores overpassing the defined threshold (G4RNA Screener)
